# Supplementary material for: E-Cadherin Is Required for Centrosome and Spindle Orientation in Drosophila Male Germline Stem Cells
Source: PubMed Central journal article supplement (PMC2930853; doi:10.1371/journal.pone.0012473), 2010-08-31

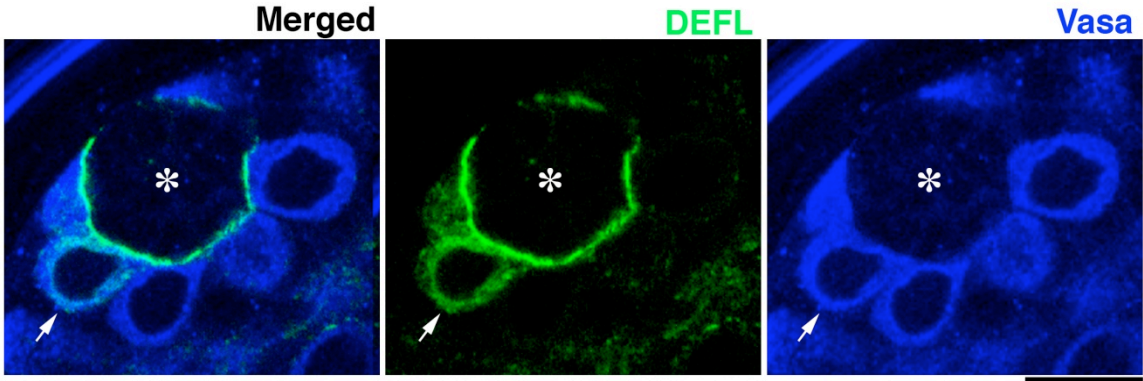

Supplement: pone.0012473.s001.pdf [file pone.0012473.s001.pdf]
